# Supplementary material for: ATM–Dependent MiR-335 Targets CtIP and Modulates the DNA Damage Response
Source: PubMed Central journal article supplement (PMC3656122; doi:10.1371/journal.pgen.1003505), 2013-05-16

Supplementary Fig.S1:

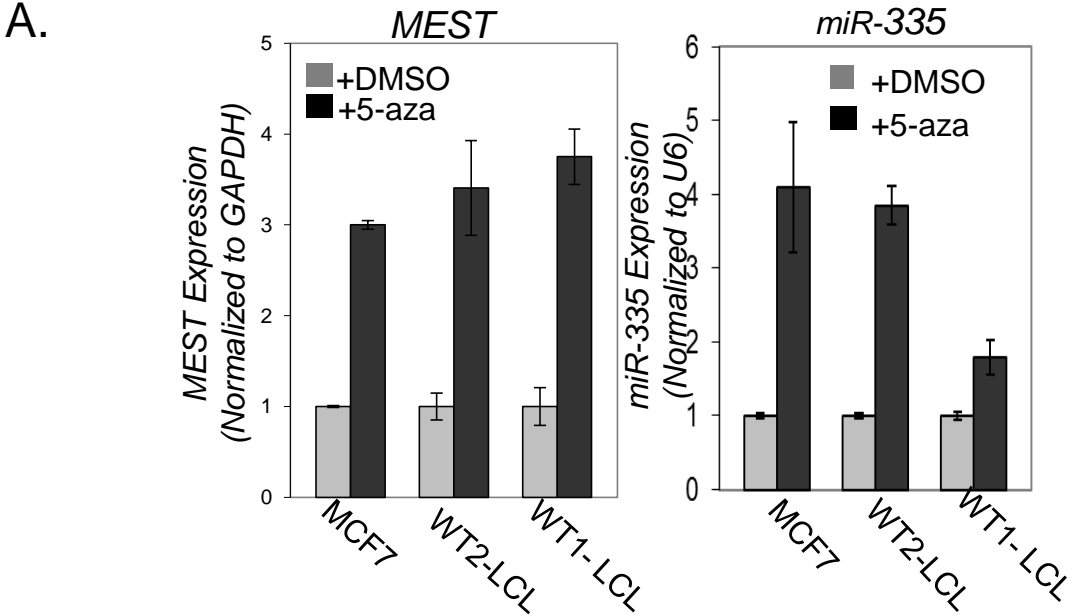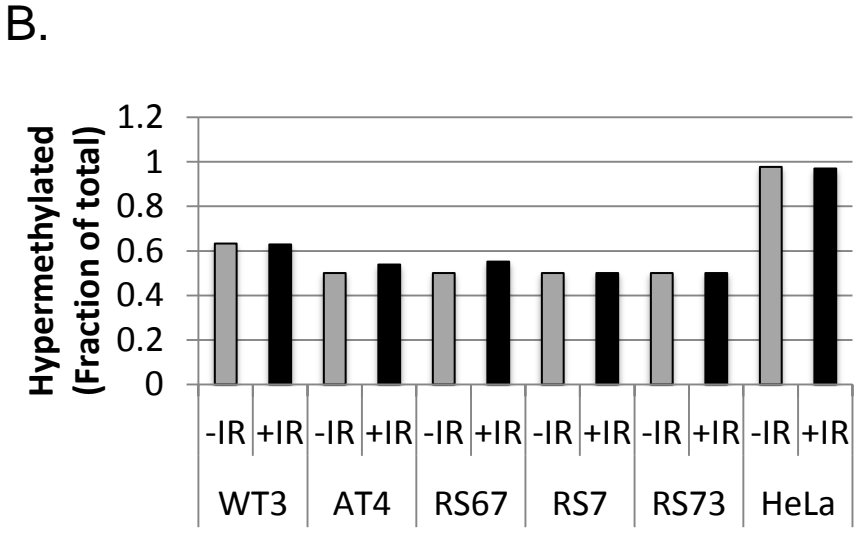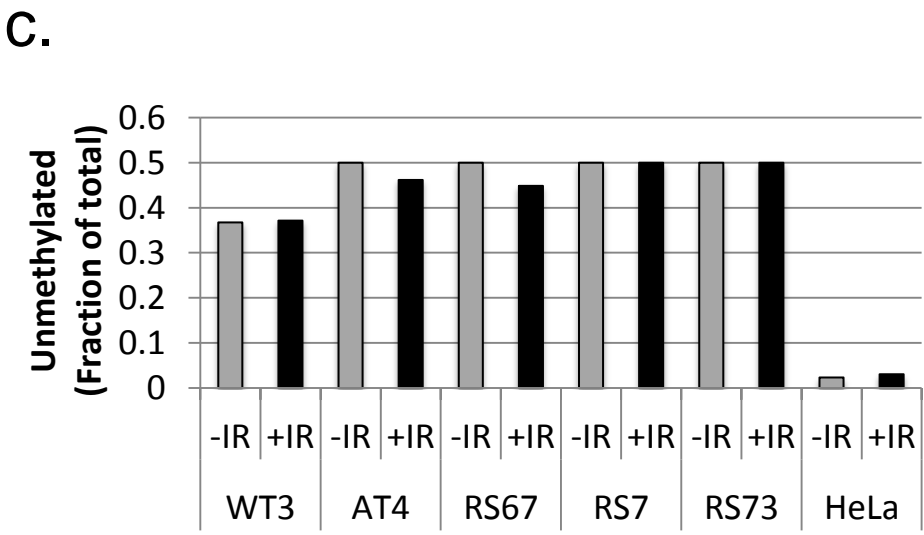

Supplement: pgen.1003505.s001.pdf [file pgen.1003505.s001.pdf]
