# Supplementary material for: ATM–Dependent MiR-335 Targets CtIP and Modulates the DNA Damage Response
Source: PubMed Central journal article supplement (PMC3656122; doi:10.1371/journal.pgen.1003505), 2013-05-16
Supplement: pgen.1003505.s008.pdf [file pgen.1003505.s008.pdf]

## Supplementary Table 1

### Experiment-verified targets for miR-335

| Target gene | Function                                                                    | Reference                                |
|-------------|-----------------------------------------------------------------------------|------------------------------------------|
| SOX4/TNC    | Breast cancer metastasis                                                    | Tavazoie et al., 2008                    |
| Daam1       | Astrocytoma cell growth and invasion                                        | Shu et al., 2011                         |
| RUNX2       | Cell proliferation, migration and differentiation of mesenchymal stem cells | Tomé et al., 2011                        |
| Bcl-w/SP1   | Gastric cancer metastasis                                                   | Xu et al., 2012                          |
| ROCK1/MAPK1 | Neuroblastoma cell invasiveness                                             | Lynch et al., 2012                       |
| RB1         | Cell proliferation and cell cycle                                           | Shi et al., 2012<br>Scarola et al., 2010 |
| CtIP        | DNA damage response                                                         | This study                               |

Tavazoie SF et al., Endogenous human microRNAs that suppress breast cancer metastasis. *Nature*. 2008 , 451:147-52.

Shu M et al., Targeting oncogenic miR-335 inhibits growth and invasion of malignant astrocytoma cells. *Mol Cancer*. 2011, 10:59.

Tomé M et al., miR-335 orchestrates cell proliferation, migration and differentiation in human mesenchymal stem cells. *Cell Death Differ*. 2011,18:985-95.

Xu Y et al., MicroRNA-335 acts as a metastasis suppressor in gastric cancer by targeting Bcl-w and specificity protein 1. *Oncogene*. 2012, 31:1398-407.

Lynch J et al., MiRNA-335 suppresses neuroblastoma cell invasiveness by direct targeting of multiple genes from the non-canonical TGF- $\beta$  signalling pathway. *Carcinogenesis*. 2012; 33:976-85..

Shi L et al., miR-335 promotes cell proliferation by directly targeting Rb1 in meningiomas. *J Neurooncol*. 2012, 110:155-62.

Scarola M et al., miR-335 directly targets Rb1 (pRb/p105) in a proximal connection to p53-dependent stress response. *Cancer Res*. 2010 ; 70:6925-33.
