# Supplementary material for: ATM–Dependent MiR-335 Targets CtIP and Modulates the DNA Damage Response
Source: PubMed Central journal article supplement (PMC3656122; doi:10.1371/journal.pgen.1003505), 2013-05-16
Supplement: pgen.1003505.s009.pdf [file pgen.1003505.s009.pdf]

### **Supplementary Methods:**

**5'-azacytidine treatment:** LCLs or MCF7 cells were treated with 5'-azacytidine (Sigma Aldrich, St. Louis, MO) at 10  $\mu$ M for 4 days. Cells were collected for total RNA extraction or nuclear and cytoplasmic lysates were isolated as described in 'Western Blotting.'

### ***MEST* promoter methylation status**

The *MEST* promoter methylation assay was performed using the EpiTech Methyl PCR Assay (Qiagen).  $10^7$  cells were mock treated or irradiated with 10 Gy and DNA was collected after 2 hours. DNA was processed according the manufactures specifications and amplified using the SybrGreen qPCR assay and *MEST* primer (Qiagen).
